# Supplementary material
Source: PubMed Central journal article supplement (PMC3200571)
Supplement: NIHMS324922-supplement-1_si_001.pdf [file NIHMS324922-supplement-1_si_001.pdf]

*Supporting Materials*

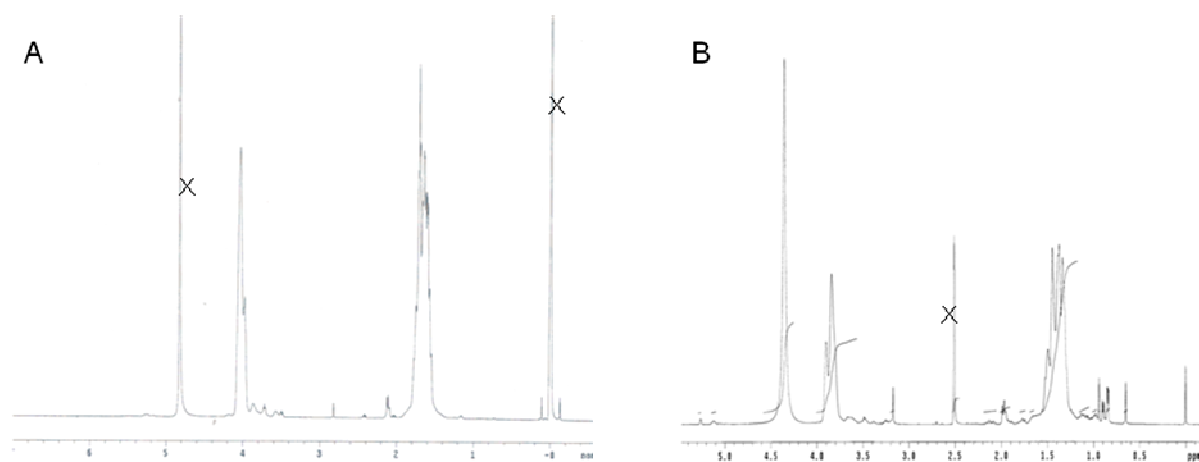

Figure S1. <sup>1</sup>H-NMR spectrum of CPVA31 in D<sub>2</sub>O (A), in DMSO-*d*<sub>6</sub> (B). Crossed peaks correspond to residual solvent peaks. Values on the x-axis are in ppm.

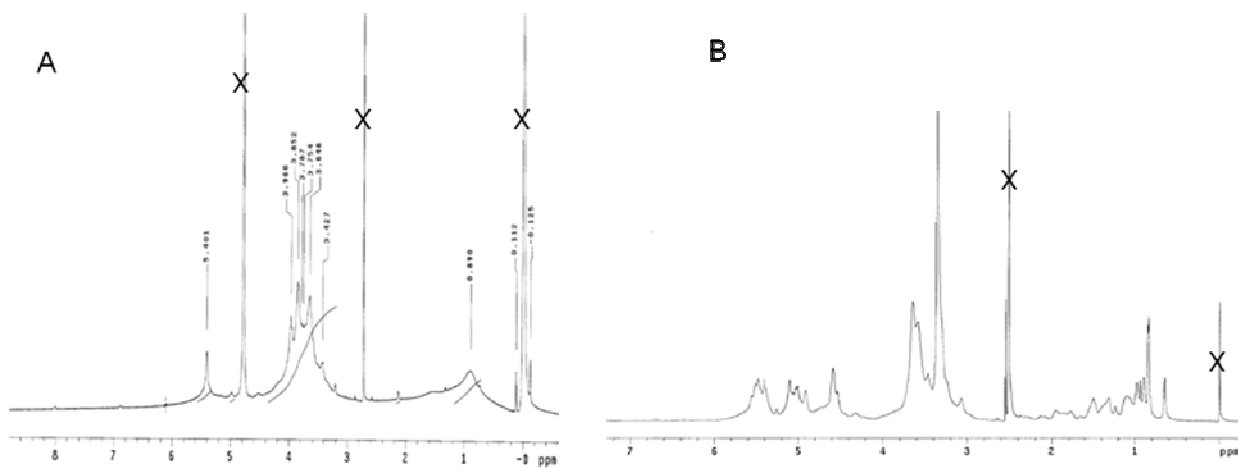

Figure S2. <sup>1</sup>H-NMR spectra of CDex9 in D<sub>2</sub>O (A) and in DMSO-*d*<sub>6</sub> (B). Crossed peaks correspond to residual solvent peaks. Values on the x-axis are in ppm.

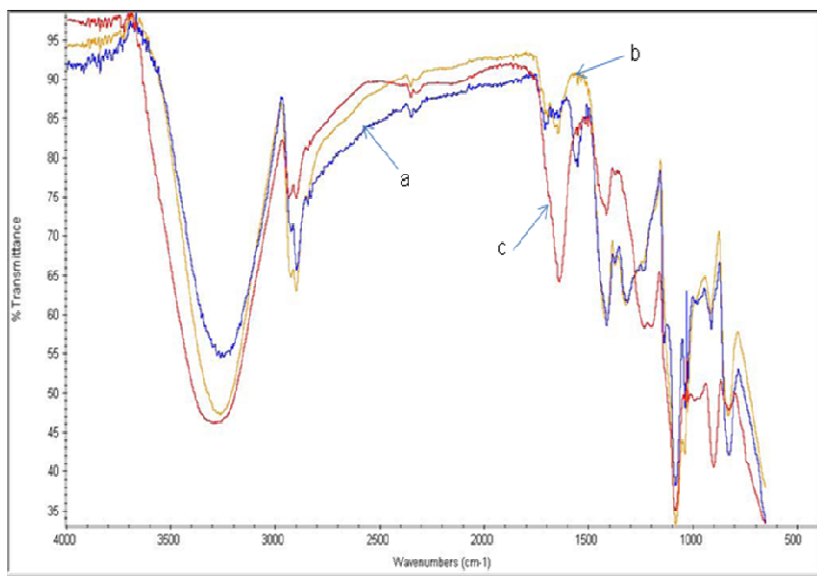

Figure S3. IR spectrum of (a) PVA31 polymer, (b) CPVA31 and (c) CPVA31-p<sub>4</sub>FdU conjugates
